# Supplementary material for: Effects of Fishmeal Replacement by Clostridium Autoethanogenum Protein Meal on Cholesterol Bile Acid Metabolism, Antioxidant Capacity, Hepatic and Intestinal Health of Pearl Gentian Grouper (Epinephelus Fuscoguttatus ♀ × Epinephelus Lanceolatus ♂)
Source: MDPI journal article supplement (doi:10.3390/ani13061090), 2023-03-18
Supplement: s1 [file s1]

## Supplementary Material

### Effects of fishmeal replacement by *Clostridium autoethanogenum* protein meal on cholesterol bile acid metabolism, antioxidant capacity, hepatic and intestinal health of pearl gentian grouper (*Epinephelus fuscoguttatus* ♀ × *Epinephelus lanceolatus* ♂)

Bocheng Huang<sup>1</sup>, Menglin Shi<sup>1</sup>, Aobo Pang<sup>1</sup>, Beiping Tan<sup>1,2,3</sup>, Shiwei Xie<sup>1,2,3,4\*</sup>

\* Correspondence: Shiwei Xie      xswzsdx@163.com

**Table S1** Nutrition composition of CAP and brown fishmeal (air-dried basis).

| Items            | Brown fish meal | CAP   | Unit  | Note          |
|------------------|-----------------|-------|-------|---------------|
| Moisture         | 6.8             | 7.14  | %     |               |
| Calcium          | 3.01            | 0.125 | %     |               |
| Ferrum           | 2400            | 970   | mg/kg |               |
| Magnesium        | 2900            | 240   | mg/kg |               |
| Manganese        | 11              | 0     | mg/kg |               |
| Potassium        | 10000           | 3000  | mg/kg |               |
| Sodium           | 16000           | 810   | mg/kg |               |
| Zinc             | 78              | 72    | mg/kg |               |
| Selenium         | 1.72            | 38.18 | mg/kg |               |
| Cobalt           | 0.241           | 7.03  | mg/kg |               |
| Iodine           | 0.357           | 0.411 | mg/kg |               |
| Total phosphorus | 2.31            | 0.99  | %     |               |
| Crude protein    | 68.21           | 84.14 | %     |               |
| Methionine       | 2.98            | 2.72  | %     | content in CP |
| Cystine          | 0.60            | 0.84  | %     | content in CP |
| Lysine           | 7.64            | 10.33 | %     | content in CP |
| Arginine         | 5.99            | 4.04  | %     | content in CP |
| Threonine        | 4.21            | 4.77  | %     | content in CP |
| Asparagine       | 8.95            | 11.33 | %     | content in CP |
| Hydroxyalanine   | 3.83            | 3.81  | %     | content in CP |
| Glutamic acid    | 12.83           | 11.61 | %     | content in CP |

|               |      |      |   |               |
|---------------|------|------|---|---------------|
| Glycine       | 6.06 | 4.60 | % | content in CP |
| Alanine       | 6.48 | 5.50 | % | content in CP |
| Valine        | 4.93 | 6.46 | % | content in CP |
| Isoleucine    | 4.02 | 6.27 | % | content in CP |
| Leucine       | 7.71 | 7.58 | % | content in CP |
| Tyrosine      | 3.36 | 3.73 | % | content in CP |
| Phenylalanine | 5.27 | 3.92 | % | content in CP |
| Histidine     | 3.04 | 2.00 | % | content in CP |
| Proline       | 4.16 | 2.85 | % | content in CP |
| Crude fat     | 9.00 | 0.19 | % |               |

---

Abbreviations: CAP: *Clostridium autoethanogenum* protein meal; CP: crude protein.
